# Supplementary material for: Controlling the device functionality by solvent engineering, solar cell versus light emitting diode
Source: Royal Society of Chemistry journal article supplement (doi:10.1039/d2tc01941h), 2022-01-01
Supplement: d2tc01941h1.pdf [file d2tc01941h1.pdf]

## Controlling the device functionality by solvent engineering, solar cell versus light emitting diode

Shir Yudco, Adva Shpatz Dayan, Bat-El Cohen, Tal Binyamin and Lioz Etgar\*

Institute of Chemistry, Casali Center for Applied Chemistry and the Center for Nanoscience and Nanotechnology, The Hebrew University of Jerusalem, Jerusalem 91904, Israel

\* [lioz.etgar@mail.huji.ac.il](mailto:lioz.etgar@mail.huji.ac.il)

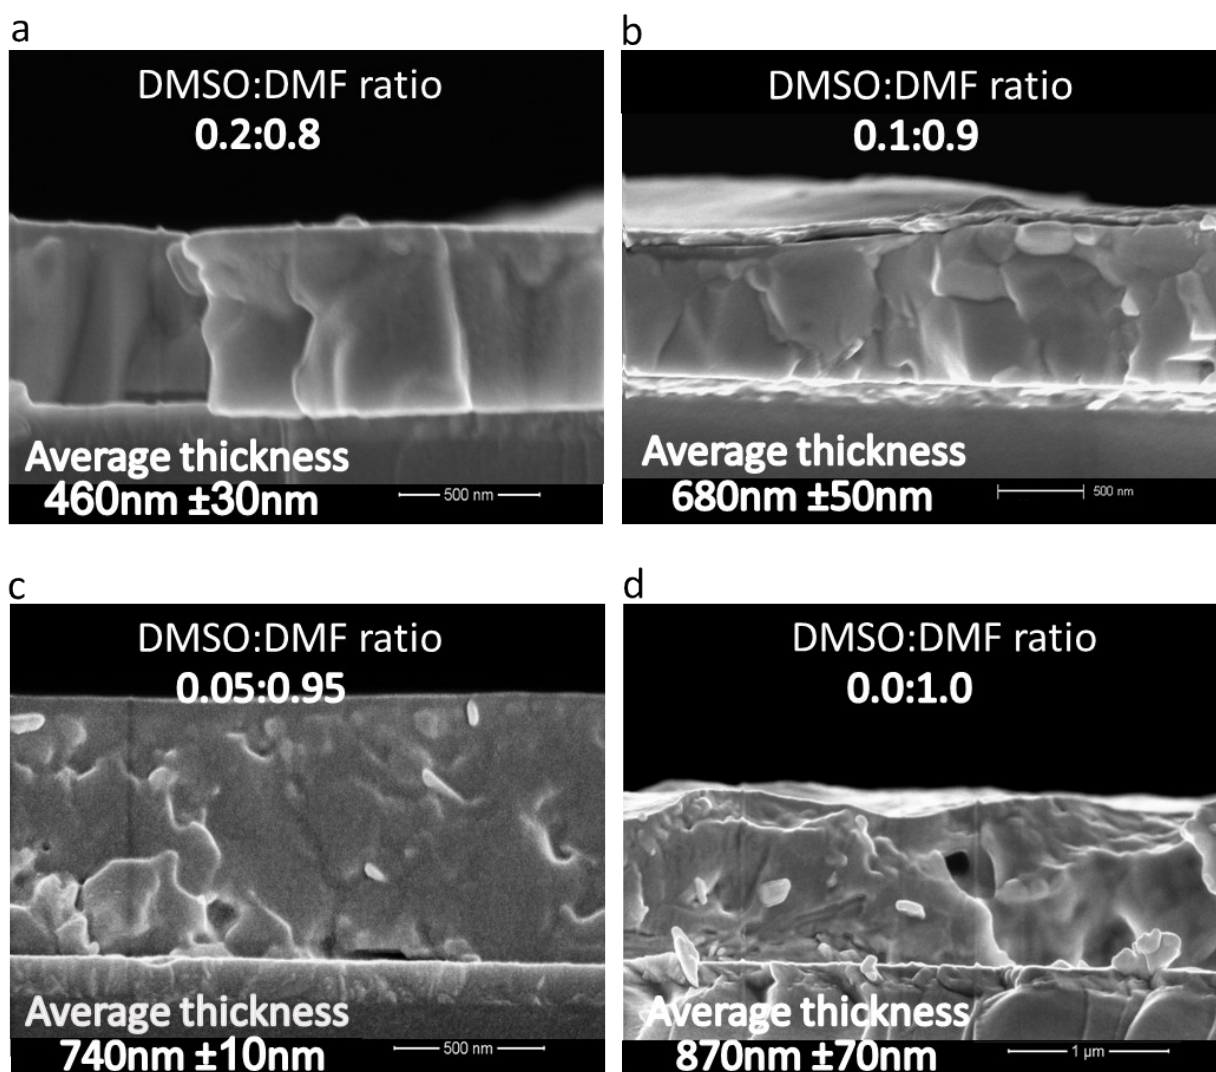

Figure S1- (a-d) Cross section SEM images of devices with different DMSO:DMF ratios, with average perovskite layer thickness of 460nm for 0.2:0.8 ratio, 680nm for 0.1:0.9, 740nm for 0.05:0.95 and 870 for 0.0:0.1.

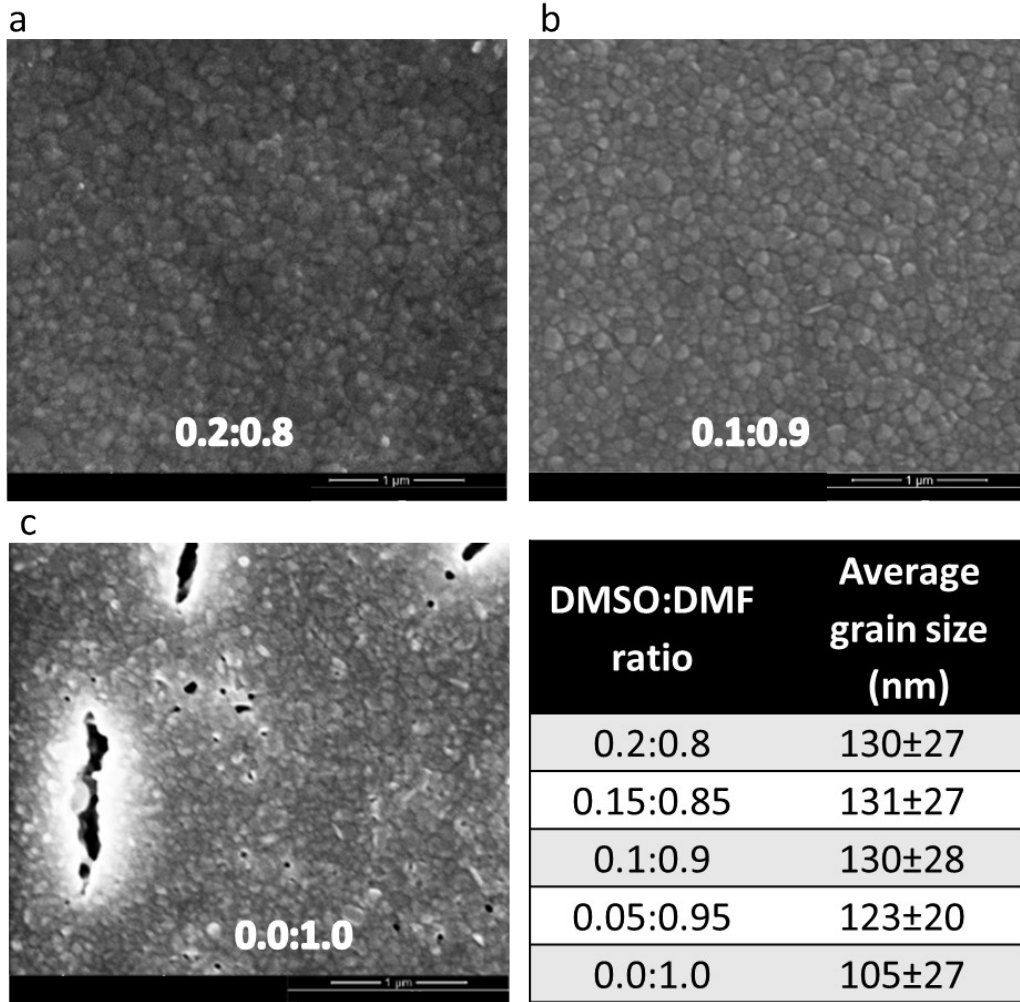

Figure S2- (a-c) Top view SEM images of devices with different DMSO:DMF ratios.

Table S1- Average grain size calculated from SEM images.

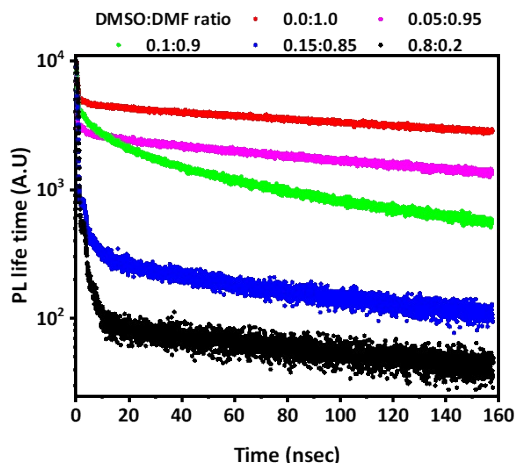

| DMSO:DMF ratio | Average PL life time (ns) |
|----------------|---------------------------|
| 0.0:1.0        | t=190.24                  |
| 0.05:0.95      | t=91.85                   |
| 0.1:0.9        | t=44.54                   |
| 0.15:0.85      | t=13.55                   |
| 0.2:0.8        | t=0.73                    |

Figure S3- Photoluminescence lifetime measurements for different DMSO:DMF ratios.

Table S2- Life time values calculated from PL life time measurements.

| Measured parameter                            | DMSO:DMF ratio |          |
|-----------------------------------------------|----------------|----------|
|                                               | 0.0:1.0        | 0.2:0.8  |
| Hall mobility<br>[cm <sup>2</sup> /V*s]       | 7.19E-01       | 8.67E-01 |
| Carrier concentration<br>[1/cm <sup>3</sup> ] | 4.97E+14       | 2.81E+15 |
| Resistivity<br>[Ω*cm]                         | 1.75E+04       | 2.56E+03 |
| Hall voltage [V]                              | 1.08E-03       | 1.91E-04 |

Table S3- Hall effect measurements for 0.0:0.1 and 0.2:0.8 DMSO:DMF ratios. Presenting hall mobility, carrier concentration, resistivity and hall voltage measured values.

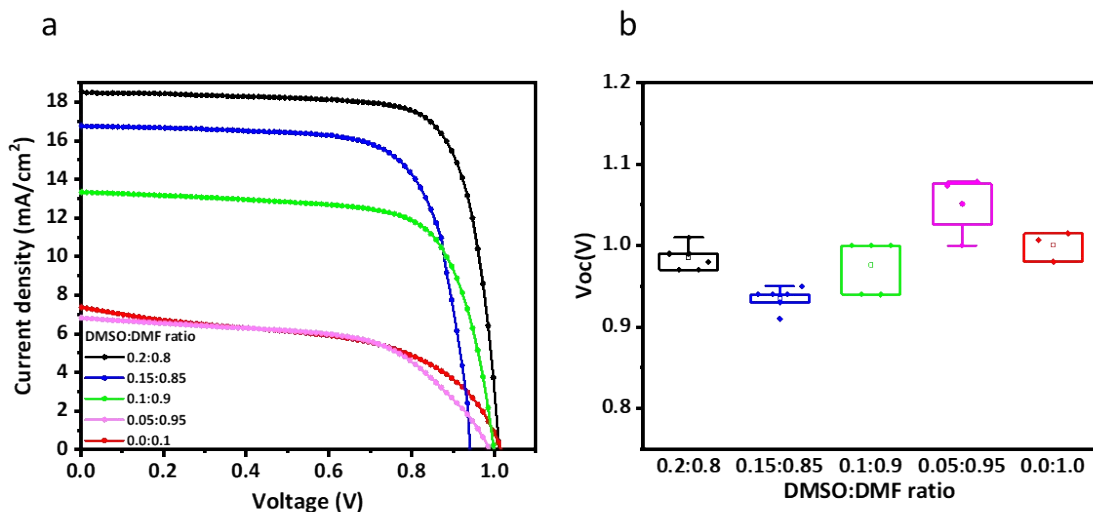

Figure S4- (a) Typical JV curve for all DMSO:DMF ratios. (b) Voc measurements of solar cells with all DMSO:DMF ratios.

| DMSO:DMF ratio   | Voc (V)   | Jsc [mA/cm <sup>2</sup> ] | FF (%) | Solar cell efficiency (%) |
|------------------|-----------|---------------------------|--------|---------------------------|
| <b>0.2:0.8</b>   | 0.98±0.02 | 17.9±0.5                  | 76±1   | 13.5±0.5                  |
| <b>0.15:0.85</b> | 0.92±0.03 | 16.8±0.6                  | 69±4   | 10.7±0.9                  |
| <b>0.1:0.9</b>   | 0.98±0.03 | 12±1                      | 69±4   | 8±1                       |
| <b>0.05:0.95</b> | 1.02±0.08 | 10±2                      | 58±3   | 6.7±0.9                   |
| <b>0.0:1.0</b>   | 0.9±0.3   | 7±2                       | 42±7   | 3±1                       |

Table S4- Average results for PV measurements of solar cells with all DMSO:DMF ratios.

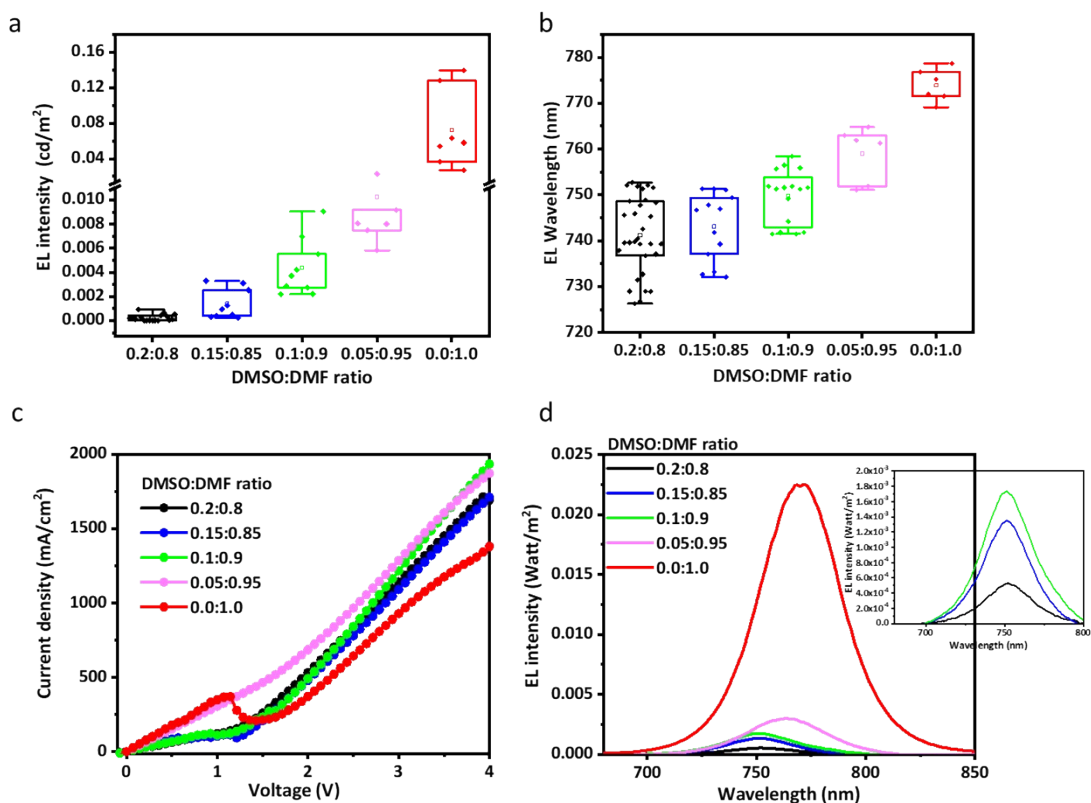

Figure S5- (a) EL intensity measured in cd/m<sup>2</sup> (b) EL wavelength at the peak maximum (c) JV of LEDs with all DMSO:DMF ratios measured during EL measurements. (d) Electroluminescence spectra of all DMSO:DMF ratios.

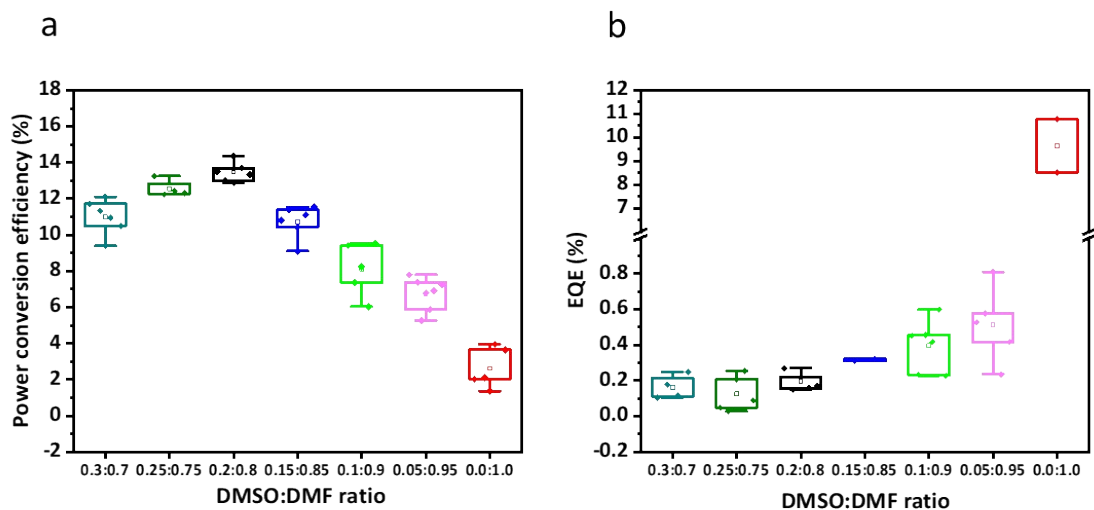

Figure S6- Solar cells and LED performance of devices with additional DMSO:DMF ratios of 0.25:0.75 and 0.3:0.7, showing a decrease in the solar cells efficiency while the LED reaches a plateau in the EQE. (a) Power conversion efficiency (PCE) of solar cells and (b) External Quantum Efficiency (EQE) of the LED.

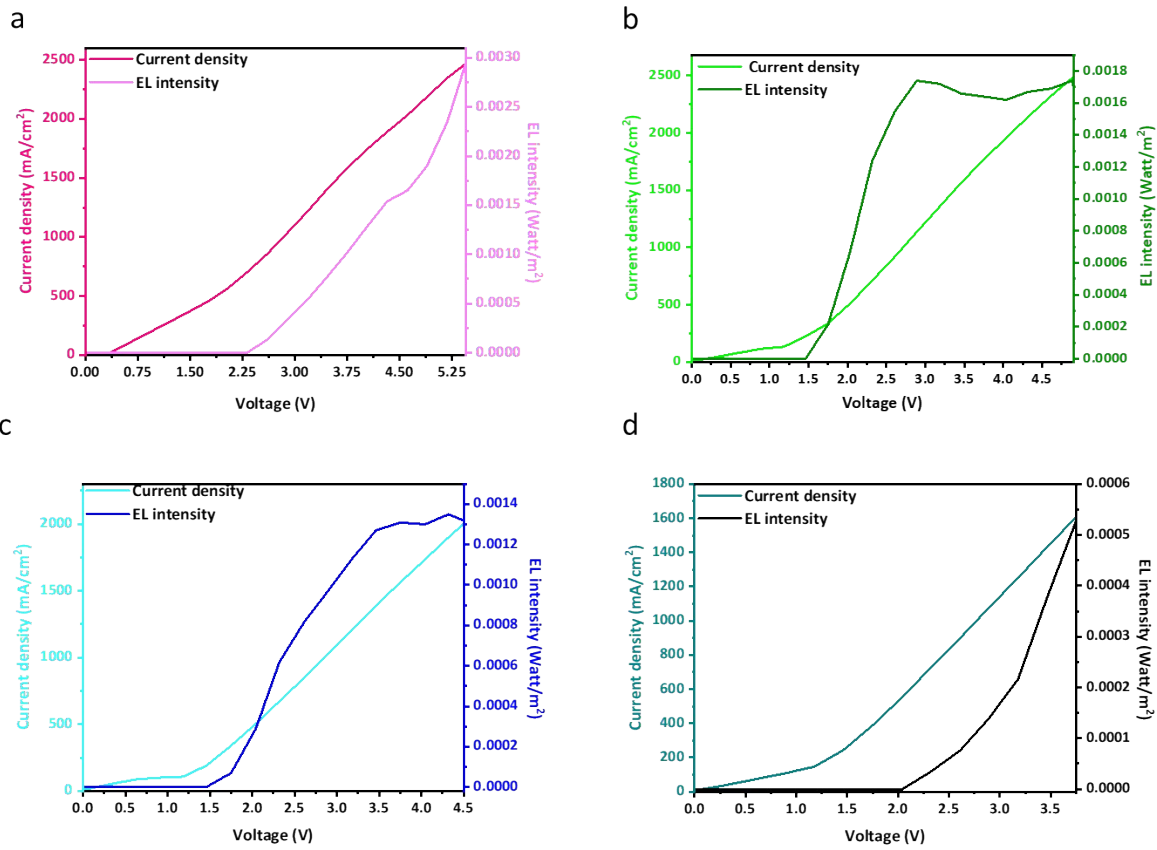

Figure S7- Current density-Voltage-EL intensity characteristics of LED devices with (a) 0.05:0.95 (b) 0.1:0.9 (c) 0.15:0.85 and (d) 0.2:0.8 DMSO:DMF ratios.

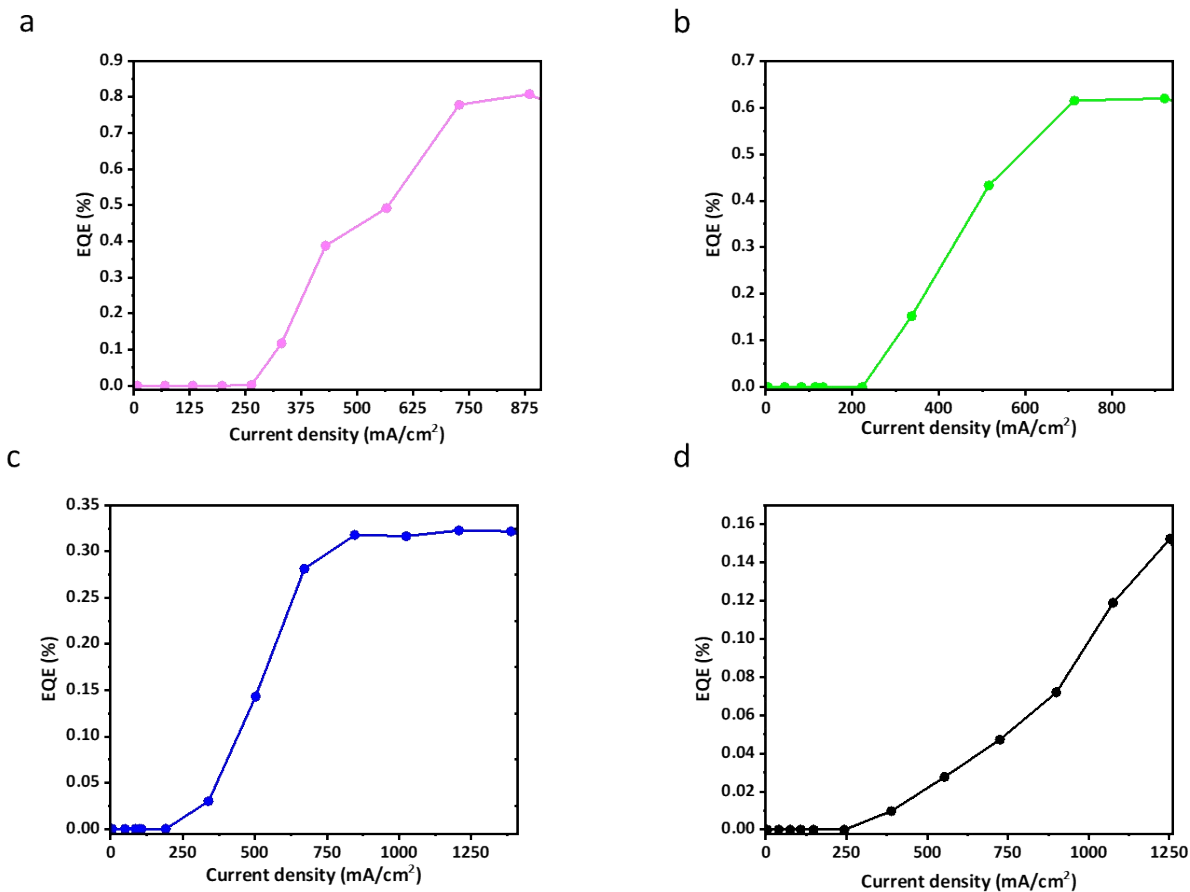

Figure S8- EQE-Current density curves of LED devices with (a) 0.05:0.95 (b) 0.1:0.9 (c) 0.15:0.85 and (d) 0.2:0.8 DMSO:DMF ratios.

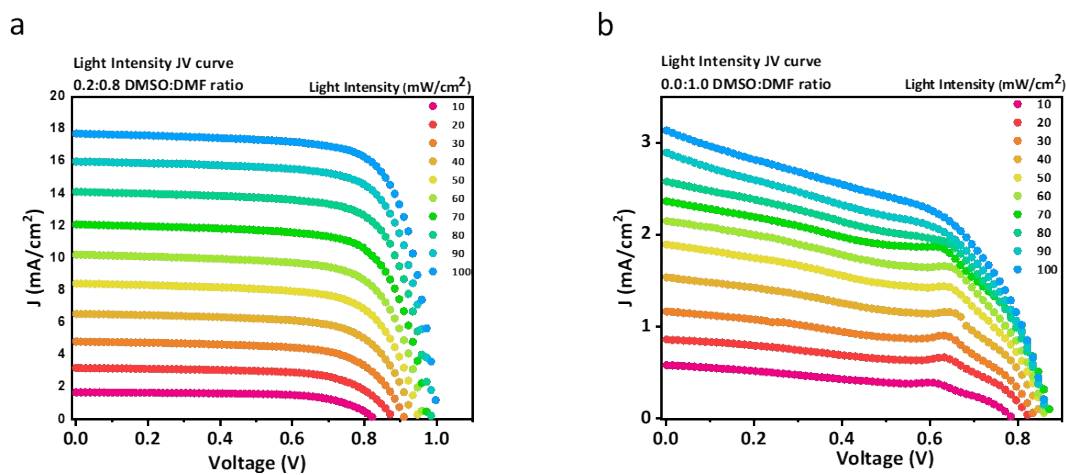

Figure S9- JV curve of light intensity measurements of (a) 0.2:0.8 DMSO:DMF ratio and (b) 0.0:1.0 DMSO:DMF ratio.
